# Supplementary material
Source: Springer Nature journal article supplement (https://www.springermedizin.de/resource/supplementary/13051_2012_271_MOESM7_ESM.pdf/9670240)

Total Costs, average over 6 months

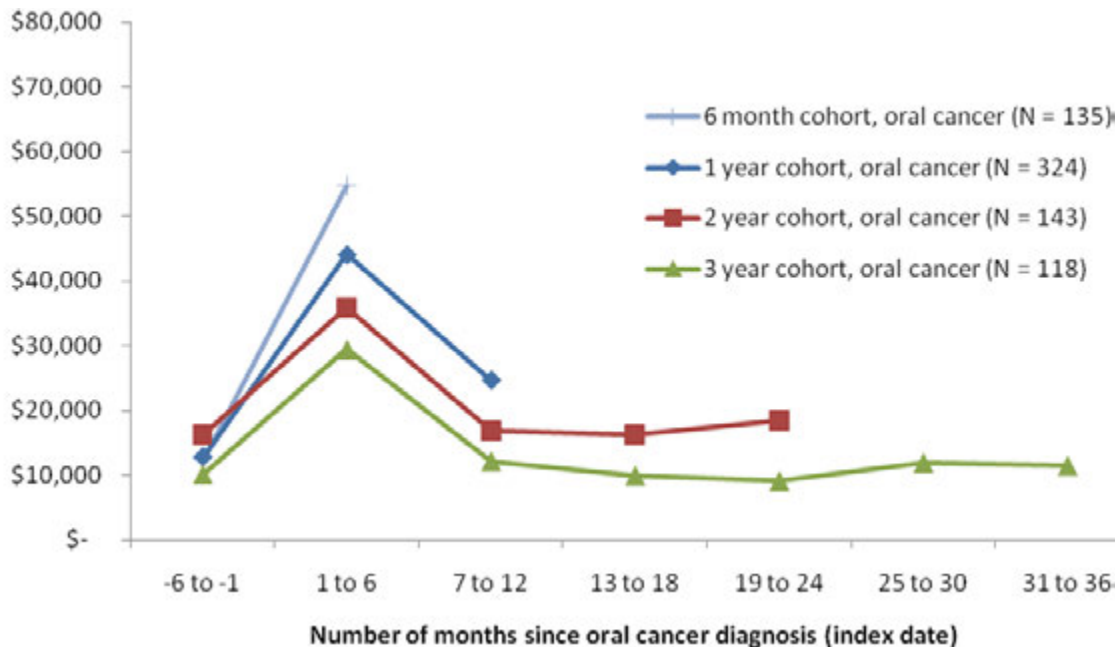

Supplement: MOESM7 [file 9670240]
